# Supplementary material for: Interference-free electron probe micro-analysis of bromine in halogen-bearing minerals and glasses: high-resolution measurements and quantitative elemental mapping
Source: Royal Society of Chemistry journal article supplement (doi:10.1039/d3ja00198a), 2023-01-01
Supplement: d3ja00198a1.xlsx [file d3ja00198a1.xlsx]

## Sheet: EPMA Major Elements
Sample	A10	2SD	A50	2SD	A100	2SD	A500	2SD	A1000	2SD	RD50	2SD	RD100	2SD	RD500	2SD	RD5000	2SD	JHSC2* core	2SD	BB1	2SD	JHSC1	2SD	JHSC4	2SD	SP	2SD	SY	2SD
wt. %
SiO2	56.24	0.46	57.08	0.63	56.6	0.61	56.55	0.28	56.82	0.45	68.12	0.48	67.25	0.25	67.42	0.37	68.16	0.36	54.63	0.55	56.26	1.02	55.99	0.72	52.14	1.44	57.84	0.78	62.01	1.65
TiO2	1.22	0.03	1.22	0.02	1.23	0.03	1.22	0.03	1.23	0.03	0.42	0.02	0.41	0.02	0.41	0.01	0.42	0.01
Al2O3	15.76	0.25	15.85	0.22	15.78	0.18	15.95	0.21	15.76	0.23	14.47	0.2	14.29	0.2	14.43	0.18	14.48	0.19	22.87	0.26	22.05	0.32	22.31	0.27	24.33	0.28	21.31	0.34	18.98	0.77
FeO	6.62	0.2	6.68	0.32	6.32	0.4	5.01	0.21	6.72	0.18	2.75	0.35	2.6	0.18	2.79	0.12	1.37	0.17	0.15	0.03	0.14	0.03	0.13	0.03	0.13	0.03	0.09	0.03	0.04	0.03
MnO	0.17	0.04	0.17	0.03	0.17	0.03	0.18	0.03	0.17	0.04	0.09	0.03	0.08	0.04	0.08	0.03	0.08	0.04	0.03	0.02	0.02	0.02	0.01	0.03	0.04	0.02	0.01	0.03	0	0.03
MgO	2.71	0.06	2.66	0.06	2.68	0.1	2.76	0.08	2.67	0.07	0.7	0.03	0.69	0.03	0.69	0.04	0.72	0.06	0.02	0.02	0.01	0.01	0.01	0.01	0.02	0.01	0.01	0.02	0	0.02
CaO	6.07	0.38	6.02	0.14	6.03	0.27	6.22	0.27	6.03	0.23	2.32	0.12	2.25	0.19	2.3	0.13	2.37	0.19	8.37	0.57	6.97	0.25	7.57	0.27	10.65	0.34	5.3	0.19	1.84	1.1
Na2O	4.09	0.25	3.94	0.14	4.12	0.25	4.36	0.21	3.99	0.19	4.52	0.23	4.66	0.3	4.74	0.23	4.72	0.24	8.01	0.29	9.13	0.29	8.8	0.34	6.84	0.23	10.17	0.27	12.63	0.84
K2O	1.53	0.07	1.52	0.09	1.53	0.07	1.55	0.07	1.51	0.06	2.8	0.11	2.75	0.09	2.81	0.06	2.78	0.09	1.48	0.1	1.47	0.08	1.38	0.06	1.3	0.03	1.45	0.06	1.15	0.23
P2O5	0.21	0.02	0.22	0.02	0.21	0.03	0.21	0.03	0.21	0.02	0.08	0.02	0.07	0.02	0.07	0.02	0.08	0.02
SO3	0.02	0.01	0.02	0.01	0.02	0.01	0.02	0.01	0.02	0.01	0.01	0.01	0.01	0	0.01	0.01	0.01	0.01	0.89	0.14	0.73	0	0.78	0	0.89	0	0.4	0	0.15	0.08
H2O*	4.98	0	4.48	0	4.9	0	6.45	0	5.98	0	3.85	0	4.17	0	4.75	0	4.2	0
CO2**																				0	0.9	0	1.18	0.1	1.48	0.11	0.51	0	0.01	0.15
TOTAL	99.69	0.55	99.94	0.51	99.65	0.41	100.57	0.51	101.25	0.33	100.2	0.75	99.31	0.31	100.63	0.6	99.77	0.64	99.88	0.62	100.06	1.17	100.4	0.61	99.7	1.72	99.85	0.82	99.96	0.76
*from Cadoux et al. (2017)
**Stoichiometrically constrained from EPMA measurements

## Sheet: LAICPMS REE
	A10		A50		A100		A500		A1000		RD10		RD50		RD100		RD500		RD5000		JHSC2		JHSC4		BB1		SP		SY		JHSC1		NIST612
	Mean	2SD	Mean	2SD	Mean	2SD	Mean	2SD	Mean	2SD	Mean	2SD	Mean	2SD	Mean	2SD	Mean	2SD	Mean	2SD	Mean	2SD	Mean	2SD	Mean	2SD	Mean	2SD	Mean	2SD	Mean	2SD	Mean	2SD
Ca43_ppm	44025.3	958.15	44294.8	1028.06	44336.9	1013.09	43755.7	371.3	43324.7	1479.44	16818.6	1481.72	16438.6	459.01	16375	354.56	16424.7	510.35	16325	436.89	62738.2	1814.47	81206.6	2452.03	53283.9	1556.43	14139.4	2105.13	43547.3	1121.08	58225.9	975.49	85305.4	1579.23
Y89_ppm	34.63	1.01	34.79	0.76	33.87	0.77	32.63	0.32	32.69	1.15	32.97	1.04	33.98	0.6	33.22	0.88	33.86	1.91	31.37	2.04	6.17	0.68	13.34	0.6	5.28	0.18	0.17	0.06	4.37	0.21	1.83	0.14	38.01	1.19
Ce140_ppm	37.94	1.09	38.55	0.65	37.82	1.18	36.45	0.81	36.66	1.2	52.76	3.76	55.45	1.81	54.51	2.34	55.46	2.41	55.1	2.29	45.89	2.74	25.87	1.18	35.99	1.56	1.4	0.24	19.12	0.47	25.88	0.69	38.25	1.12
Pr141_ppm	4.69	0.16	4.67	0.18	4.58	0.12	4.46	0.16	4.42	0.19	5.77	0.29	5.94	0.15	5.88	0.26	5.93	0.35	5.73	0.26	4.37	0.36	3.51	0.15	3.75	0.2	0.15	0.04	1.83	0.06	2.66	0.19	38.01	1.59
Nd146_ppm	20.21	0.71	20.17	0.75	19.6	0.68	18.89	0.52	18.97	0.84	21.95	1.1	22.72	0.73	22.2	1.12	22.58	1.64	21.17	1.23	14.53	0.69	15.58	0.9	13.04	0.79	0.54	0.13	5.94	0.34	8.95	0.57	36.1	1.92
Sm147_ppm	5.18	0.41	5.19	0.26	5.02	0.38	4.83	0.19	4.9	0.53	4.84	0.35	5.02	0.28	4.93	0.2	4.95	0.47	4.72	0.32	2.17	0.3	4.02	0.41	2.19	0.19	BDL		1.05	0.38	1.25	0.41	38.38	1.74
Eu151_ppm	1.37	0.08	1.37	0.07	1.33	0.07	1.28	0.09	1.29	0.07	0.88	0.24	0.96	0.04	0.91	0.06	0.92	0.08	0.89	0.09	0.9	0.14	1.65	0.19	0.83	0.09	0.07	0.02	0.39	0.06	0.55	0.11	35.78	1.89
Gd157_ppm	5.36	0.4	5.51	0.51	5.38	0.39	5.2	0.31	5.22	0.31	4.78	0.26	4.96	0.32	5	0.55	5.01	0.56	4.59	0.53	1.59	0.32	3.17	0.55	1.55	0.29	BDL		0.96	0.34	0.78	0.27	38.19	2.42
Tb159_ppm	0.9	0.05	0.91	0.05	0.89	0.05	0.86	0.05	0.87	0.07	0.8	0.06	0.83	0.06	0.8	0.04	0.83	0.07	0.77	0.09	0.2	0.04	0.45	0.04	0.19	0.03	BDL		0.12	0.02	0.08	0.01	37.03	1.44
Dy163_ppm	6.08	0.2	6.16	0.31	5.94	0.35	5.87	0.17	5.67	0.28	5.47	0.27	5.66	0.34	5.54	0.18	5.54	0.46	5.23	0.37	1.07	0.11	2.61	0.24	0.97	0.11	0.12	0.04	0.74	0.12	0.43	0.12	36.26	2
Ho165_ppm	1.29	0.06	1.31	0.04	1.27	0.06	1.22	0.06	1.23	0.06	1.15	0.08	1.22	0.06	1.18	0.11	1.22	0.08	1.13	0.12	0.18	0.04	0.47	0.05	0.17	0.02	0.01	0.01	0.13	0.03	0.07	0.02	37.8	1.78
Er166_ppm	3.96	0.16	3.98	0.12	3.86	0.18	3.67	0.2	3.67	0.17	3.81	0.17	3.81	0.14	3.78	0.2	3.82	0.37	3.54	0.31	0.52	0.08	1.25	0.17	0.44	0.09	BDL		0.37	0.07	0.16	0.07	38.54	1.82
Tm169_ppm	0.55	0.05	0.56	0.03	0.55	0.03	0.54	0.04	0.53	0.06	0.56	0.03	0.58	0.05	0.58	0.04	0.59	0.05	0.54	0.03	0.06	0.03	0.15	0.03	0.06	0.02	0.03		0.05	0.02	0.03	0	36.81	1.3
Yb172_ppm	4.01	0.25	4.05	0.19	3.89	0.25	3.75	0.18	3.74	0.19	4.07	0.15	4.15	0.22	4.12	0.2	4.16	0.41	3.94	0.36	0.44	0.07	0.95	0.15	0.37	0.06	0.06	0.04	0.32	0.07	0.13	0.05	38.44	1.65
Lu175_ppm	0.59	0.04	0.61	0.05	0.59	0.04	0.57	0.06	0.56	0.06	0.62	0.04	0.64	0.04	0.64	0.06	0.66	0.1	0.62	0.06	0.07	0.03	0.14	0.03	0.05	0.02	BDL		0.04	0.01	BDL		36.74	1.25
*Below Detection Limit
