# Supplementary material for: Interference-free electron probe micro-analysis of bromine in halogen-bearing minerals and glasses: high-resolution measurements and quantitative elemental mapping
Source: Royal Society of Chemistry journal article supplement (doi:10.1039/d3ja00198a), 2023-01-01
Supplement: d3ja00198a2.pdf [file d3ja00198a2.pdf]

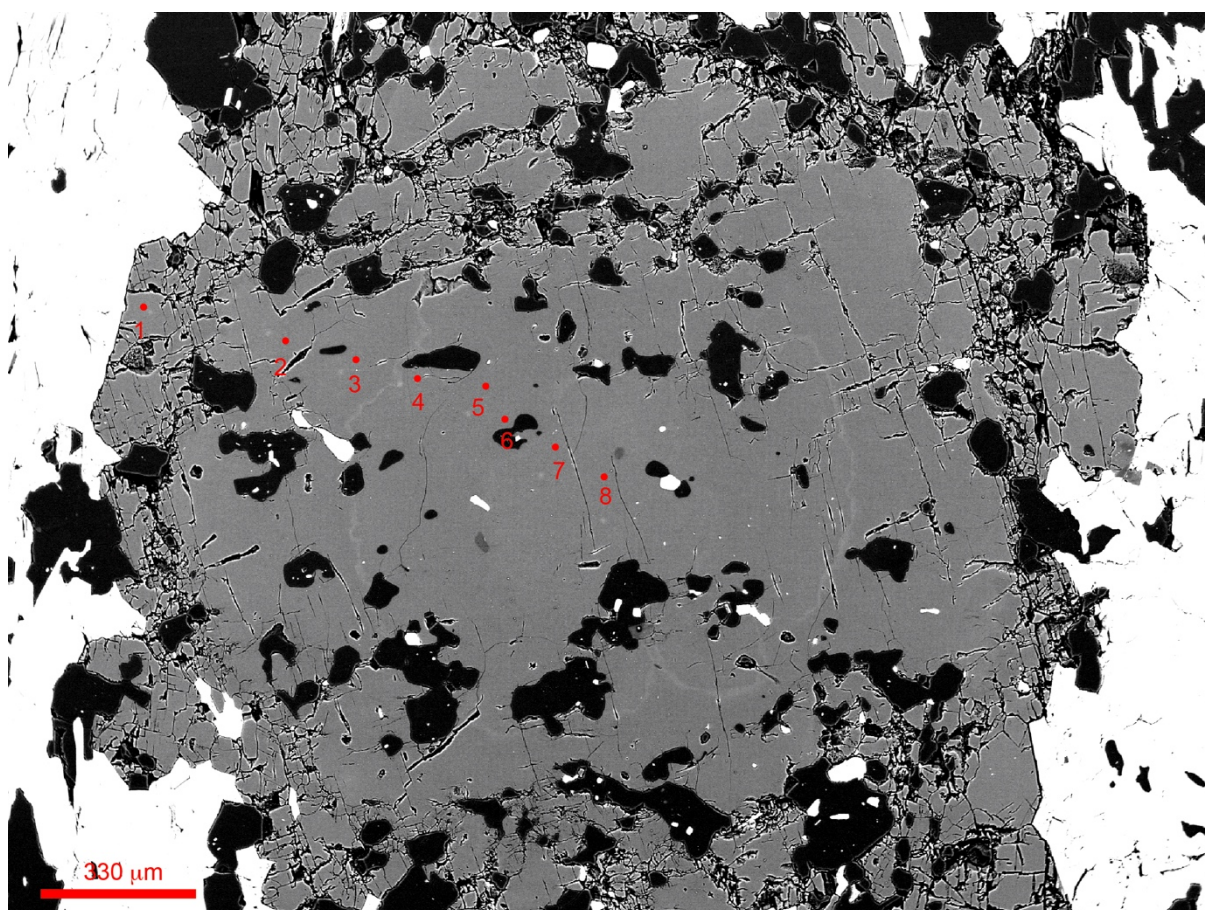

Figure A-1. BSE image of scapolite grain 22-JH-03 with location of EPMA analyses.

Table A-1: EPMA analyses of spots shown in Fig. A-1 and corresponding molar Cl/Br ratios. All concentrations are in wt.% except for Br, which is in  $\mu\text{g g}^{-1}$ .

| Analysis  | Na <sub>2</sub> O | CaO   | K <sub>2</sub> O | FeO  | SiO <sub>2</sub> | Al <sub>2</sub> O <sub>3</sub> | Cl   | Br ( $\mu\text{g g}^{-1}$ ) | CO <sub>2</sub> | TOTAL | Cl/Br (m) |
|-----------|-------------------|-------|------------------|------|------------------|--------------------------------|------|-----------------------------|-----------------|-------|-----------|
| 22JH-03-1 | 6.73              | 12.07 | 0.59             | 0.10 | 51.44            | 25.12                          | 1.73 | 322                         | 2.18            | 100   | 121       |
| 22JH-03-2 | 7.63              | 10.89 | 0.57             | 0.00 | 52.64            | 24.45                          | 2.12 | 2309                        | 1.47            | 100   | 21        |
| 22JH-03-3 | 7.34              | 10.74 | 0.62             | 0.00 | 52.44            | 24.49                          | 2.10 | 2093                        | 2.05            | 100   | 23        |
| 22JH-03-4 | 8.42              | 9.48  | 0.60             | 0.01 | 53.51            | 23.92                          | 2.42 | 4151                        | 1.22            | 100   | 13        |
| 22JH-03-5 | 8.21              | 9.47  | 0.61             | 0.00 | 53.57            | 24.08                          | 2.40 | 2733                        | 1.38            | 100   | 20        |
| 22JH-03-6 | 7.91              | 9.98  | 0.62             | 0.00 | 53.22            | 24.13                          | 2.33 | 2720                        | 1.52            | 100   | 19        |
| 22JH-03-7 | 7.97              | 10.07 | 0.67             | 0.03 | 53.39            | 23.98                          | 2.36 | 3734                        | 1.17            | 100   | 14        |
| 22JH-03-8 | 8.12              | 9.78  | 0.59             | 0.00 | 53.20            | 24.12                          | 2.30 | 4014                        | 1.49            | 100   | 13        |
